# Supplementary material
Source: Research Square preprint supplement (doi:10.21203/rs.3.rs-8869107/v1)
Supplement: Supplementary file 1 [file 7b7b47c403bb8eda72a2360f.docx]

**Supplementary material for publication**

**Título (Português)**: Intervenção comunitária transformadora de género e mudanças no uso de métodos contraceptivos reversíveis de longa duração entre adolescentes e jovens mulheres em distritos desfavorecidos de Moçambique

**Resumo em Português**

**Introdução**

Moçambique continua a enfrentar elevadas taxas de gravidez na adolescência, associadas ao uso limitado de métodos contraceptivos modernos e a normas de género que restringem a autonomia das raparigas adolescentes e mulheres jovens (RAMJ) na tomada de decisões reprodutivas. Evidências sobre intervenções comunitárias de grande escala com abordagem transformadora de género que influenciam o uso de contraceptivos modernos e de métodos reversíveis de longa duração ainda são escassas. O projecto IMPACTO (2018–2024) implementou uma intervenção multinível em nove distritos desfavorecidos das províncias de Manica e Tete, combinando estratégias comunitárias transformadoras de género com o reforço de serviços de saúde sexual e reprodutiva responsivos aos jovens. Este resumo apresenta os principais resultados da avaliação de linha de base (2018–2019) e linha final (2023).

**Métodos**

Foi realizado um inquérito domiciliar transversal repetido envolvendo RAMJ (15–24 anos) e homens (18–49 anos), seleccionados através de amostragem por percurso aleatório. Os questionários recolheram informação sobre uso de contraceptivos, atitudes face ao planeamento familiar, normas de género, tomada de decisão no agregado familiar, atitudes de violência baseada no género e conhecimento da legislação sobre o aborto. As proporções observadas na linha de base e na linha final foram comparadas para avaliar mudanças associadas à implementação do projecto

**Resultados**

Participaram 4.861 indivíduos na linha de base e 5.028 na linha final. O uso de métodos contraceptivos modernos entre RAMJ sexualmente activas aumentou de 43,3% para 56,4%. O uso de implantes registou um crescimento expressivo, passando de 3,0% para 15,4%, o que representa um aumento de quatro vezes na adopção de métodos contraceptivos reversíveis de longa duração. Observou-se igualmente melhoria nas atitudes favoráveis ao uso de contraceptivos, incluindo maior concordância de que o espaçamento das gravidezes melhora a saúde materna e infantil e de que os métodos são seguros antes do primeiro parto. No domínio das normas de género, a proporção de RAMJ com atitudes de género equitativas aumentou de 17,4% para 41,8%, enquanto entre os homens passou de 33,1% para 49,3%. A tomada de decisão conjunta no agregado familiar aumentou substancialmente de 16,0% para 65,0%, refletindo maior participação das jovens mulheres nas decisões domésticas e de saúde. Registou-se ainda redução significativa no casamento precoce e na violência baseada no género, bem como aumento do conhecimento sobre a legalidade do aborto, que passou de 10,9% para 40,7%. De forma consistente, as melhorias no uso de contraceptivos ocorreram em paralelo com mudanças nas normas sociais, na agência feminina e no ambiente estrutural, em consonância com a teoria de mudança do projecto

**Conclusões**

Os resultados indicam que a combinação de estratégias comunitárias transformadoras de género com o reforço de serviços de saúde responsivos aos jovens esteve associada a aumentos substanciais no uso de contraceptivos modernos e a uma mudança significativa para métodos de longa duração entre RAMJ em contextos desfavorecidos. Os achados sugerem que intervenções que abordam simultaneamente normas sociais, dinâmicas de poder no agregado familiar e qualidade dos serviços podem acelerar o acesso equitativo a métodos contraceptivos altamente eficazes entre adolescentes e jovens em Moçambique.

**Palavras-chave (Português)**

Raparigas adolescentes e mulheres jovens; Prevalência de contraceptivos modernos; Métodos contraceptivos reversíveis de longa acção; Normas de género; Intervenções transformadoras de género; Engajamento masculino; Tomada de decisão domiciliar; Moçambique; Avaliação de programas de planeamento familiar.
